# Supplementary material
Source: publisher figshare collection journal article supplement (https://acs.figshare.com/ndownloader/files/4705810)
Supplement: Supplementary file 1 [file 4705810]

## Supporting Information

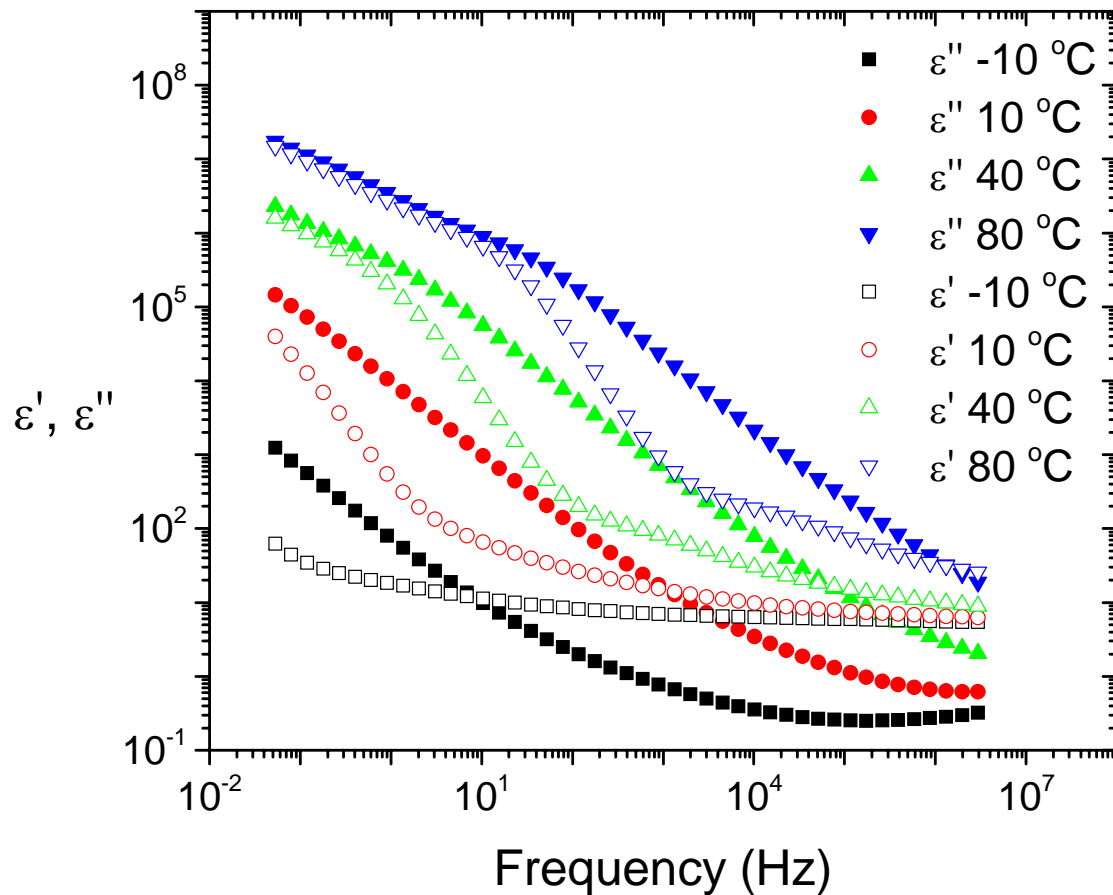

Dielectric constant and loss as a function of frequency across the temperature range of interest, for the ionomer with 17 mol % ions (I-17).

## Supporting Information

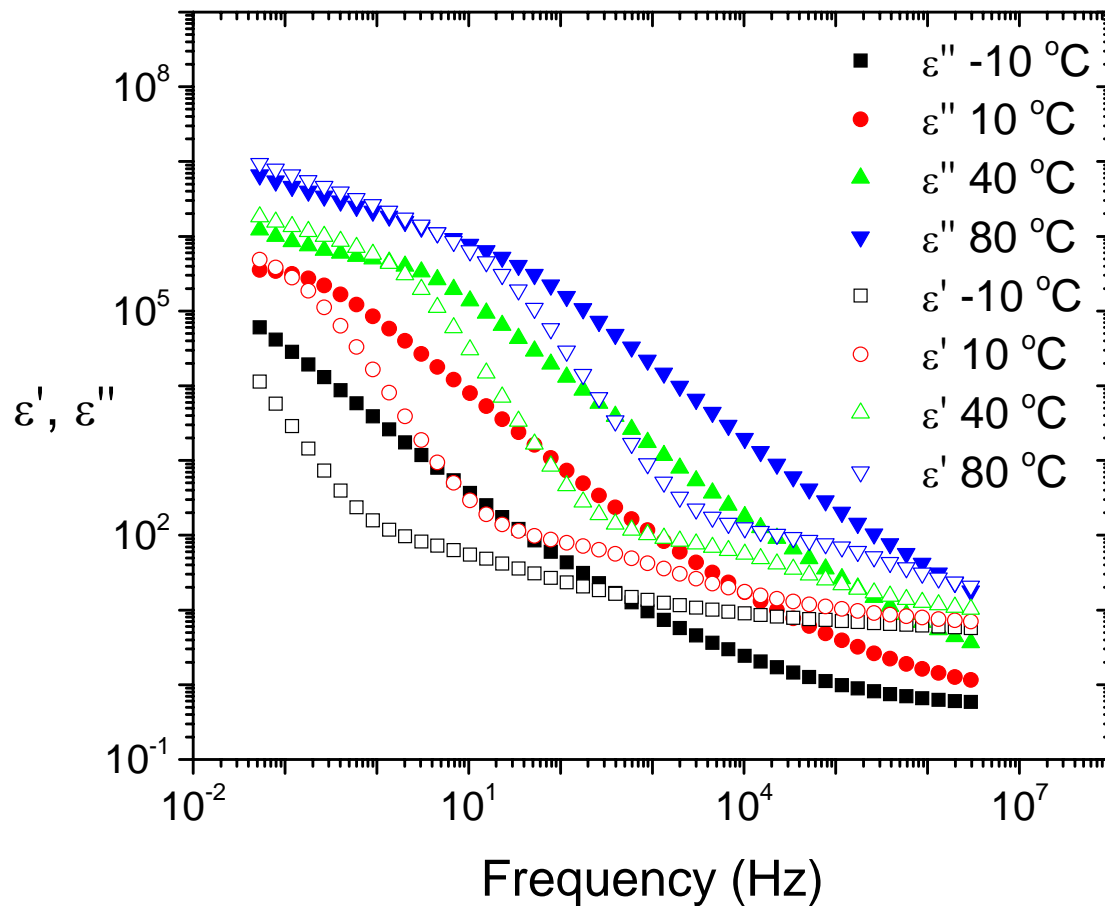

Dielectric constant and loss as a function of frequency across the temperature range of interest, for the ionomer with 9 mol % ions (I-9).

## Supporting Information

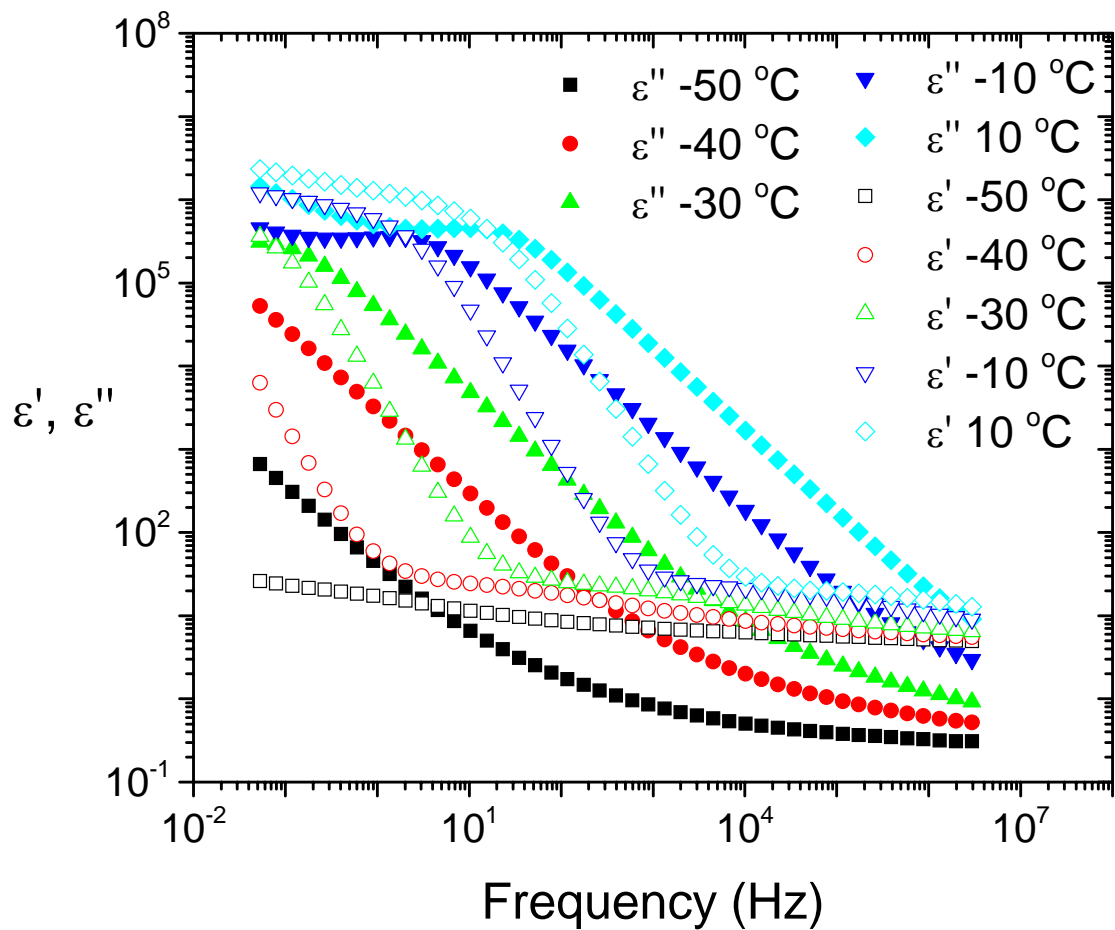

Dielectric constant and loss as a function of frequency across the temperature range of interest, for the doped polymer with 15 mol % ions (D-15).

## Supporting Information

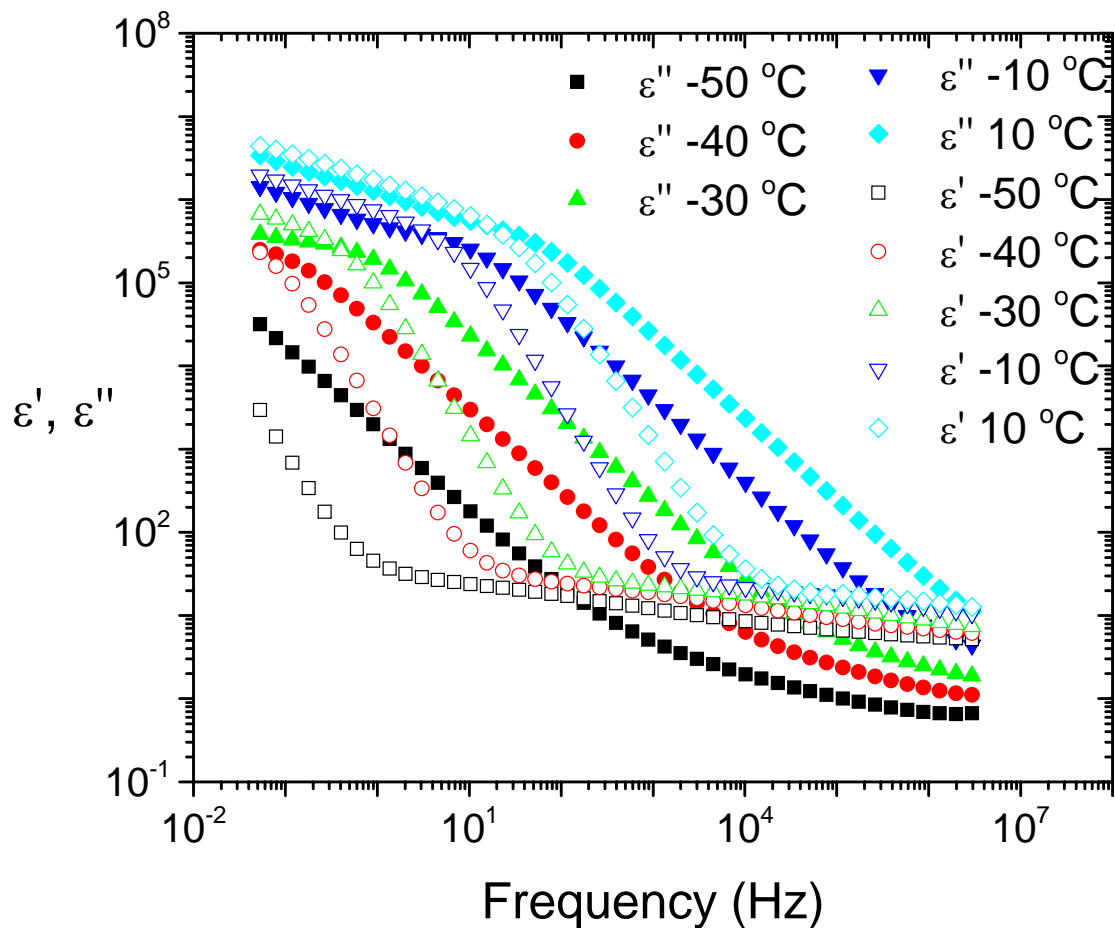

Dielectric constant and loss as a function of frequency across the temperature range of interest, for the doped polymer with 10 mol % ions (I-10).
